# Supplementary material for: Clinical Relevance of Liver Involvement in the Clinical Course of Systemic Sclerosis
Source: MDPI journal article supplement (doi:10.3390/jcm11040966), 2022-02-12
Supplement: s1 [file s1]

## Supplementary material

**Table S1. Univariate analysis of Liver Stiffness predictors.** ILD: interstitial lung disease; HCQ: hydroxychloroquine; MTX: methotrexate; BMI: body mass index; WC: waist circumference; AC: arm circumference; ANA: anti-nuclear antibodies; Anti-RNP: anti ribonucleoprotein antibodies; Anti-dsDNA: anti double strand DNA; AMA: anti-mitochondrial antibodies; Gp210: Anti-glycoprotein-210 antibodies; ALT: alanine-aminotransferase; AST: aspartate-aminotransferase; GGT: gamma-glutamyltransferase; ALP: alkaline phosphatase.

|                                     | <b>Odds Ratio</b>       | <b><i>p</i></b> |
|-------------------------------------|-------------------------|-----------------|
| <b>Male gender</b>                  | 2.12 [0.49-9]           | 0.31            |
| <b>Age</b>                          | 2.89 [0.92-9.09]        | 0.07            |
| <b>Disease duration</b>             | 0.62 [0.2-1.94]         | 0.40            |
| <b>SSc variant</b>                  | 3.13 [0.38-25.71]       | 0.29            |
| <b>ILD</b>                          | 1.48 [0.46-4.81]        | 0.51            |
| <b>Gastrointestinal involvement</b> | 1.47 [0.5-4.37]         | 0.49            |
| <b>Arterial hypertension</b>        | 1.45 [0.49-4.28]        | 0.50            |
| <b>Active cancer</b>                | 1.64 [0.4-6.77]         | 0.49            |
| <b>Cardiac disease</b>              | 2.89 [0.84-9.93]        | 0.09            |
| <b>Diabetes</b>                     | 1.28 [0.13-12.3]        | 0.83            |
| <b>Alcohol</b>                      | <b>4.17[1.02-16.97]</b> | <b>0.04</b>     |
| <b>Smoke</b>                        | 2.64 [0.83-8.4]         | 0.10            |
| <b>HCQ</b>                          | 1.05 [0.31-3.61]        | 0.94            |
| <b>Steroids</b>                     | 0.73 [0.23-2.7]         | 0.71            |
| <b>MTX</b>                          | 0.42 [0.05-3.54]        | 0.43            |
| <b>BMI</b>                          | 1.78 [0.59-5.34]        | 0.30            |
| <b>WC</b>                           | <b>4.13 [1.3-13.06]</b> | <b>0.02</b>     |
| <b>AC</b>                           | 1.23 [0.13-11.99]       | 0.86            |
| <b>ANA</b>                          | 1.34 [0.27-6.6]         | 0.72            |

|                   |                            |              |
|-------------------|----------------------------|--------------|
| <b>Anti-Ro</b>    | 0.67 [0.14-3.30]           | 0.63         |
| <b>Anti-Ro60</b>  | 1.01 [0.20-5.14]           | 0.99         |
| <b>Anti-Ro52</b>  | 0.61 [0.07-5.23]           | 0.65         |
| <b>Anti-La</b>    | 5.64 [0.73-43.43]          | 0.10         |
| <b>Anti-RNP</b>   | 2.12 [0.49-9.0]            | 0.31         |
| <b>Anti-dsDNA</b> | 1.00 [0.11-9.18]           | 1.000        |
| <b>AMA</b>        | <b>4.67 [1.44-15.13]</b>   | <b>0.01</b>  |
| <b>Sp100</b>      | 0.5 [0.03-9.78]            | 0.65         |
| <b>Gp210</b>      | 15 [0.58-385.62]           | 0.10         |
| <b>ALT</b>        | 4.44 [0.89-22.18]          | 0.07         |
| <b>AST</b>        | 3.72 [0.57-24.28]          | 0.17         |
| <b>ALP</b>        | <b>34.09 [3.64-319.71]</b> | <b>0.002</b> |
| <b>GGT</b>        | 2.87 [0.9-9.2]             | 0.08         |

**Table S2. Univariate analysis of Liver Steatosis predictors.** ILD: interstitial lung disease; HCQ: hydroxychloroquine; MTX: methotrexate; BMI: body mass index; WC: waist circumference; AC: arm circumference; ANA: anti-nuclear antibodies; Anti-RNP: anti ribonucleoprotein antibodies; Anti-dsDNA: anti double strand DNA; AMA: anti-mitochondrial antibodies; Gp210: Anti-glycoprotein-210 antibodies; ALT: alanine-aminotransferase; AST: aspartate-aminotransferase; GGT: gamma-glutamyltransferase; ALP: alkaline phosphatase.

|                                     | <b>Odds Ratio</b> | <b><i>p</i></b> |
|-------------------------------------|-------------------|-----------------|
| <b>Male gender</b>                  | 1.90 [0.1-36.11]  | 0.668           |
| <b>Age</b>                          | 1.12 [0.21-5.85]  | 0.894           |
| <b>Disease duration</b>             | 3.24 [0.56-18.3]  | 0.189           |
| <b>SSc variant</b>                  | 0.85 [0.09-7.92]  | 0.891           |
| <b>ILD</b>                          | 3.24 [0.61-17.26] | 0.169           |
| <b>Gastrointestinal involvement</b> | 4.14 [0.72-23.92] | 0.113           |
| <b>Arterial hypertension</b>        | 2.24 [0.39-12.85] | 0.366           |

|                 |                            |              |
|-----------------|----------------------------|--------------|
| Active cancer   | 1.28 [0.14-11.95]          | 0.827        |
| Cardiac disease | 0.99 [0.12-9.06]           | 0.991        |
| Diabetes        | <b>14.33 [1.84-111.45]</b> | <b>0.011</b> |
| Alcohol         | 0.58 [0.03-11.01]          | 0.713        |
| Smoke           | 0.26 [0.01-4.83]           | 0.367        |
| HCQ             | 1.85 [0.21-16.62]          | 0.585        |
| Steroids        | 0.48 [0.05-4.35]           | 0.518        |
| MTX             | 1.58 [0.17-14.92]          | 0.690        |
| BMI             | <b>11.7 [1.31-105.41]</b>  | <b>0.028</b> |
| WC              | <b>12.08 [1.34-108.96]</b> | <b>0.026</b> |
| AC              | 4.06 [0.36-45.36]          | 0.255        |
| ANA             | 2.50 [0.13-46.80]          | 0.541        |
| Anti-Ro         | 0.34 [0.02-6.30]           | 0.467        |
| Anti-Ro60       | 0.48 [0.03-9.0]            | 0.621        |
| Anti-Ro52       | 0.65 [0.03-12.5]           | 0.776        |
| Anti-La         | 1.46 [0.07-30.21]          | 0.806        |
| Anti-RNP        | 1.58 [0.17-14.92]          | 0.690        |
| Anti-dsDNA      | 0.98 [0.05-19.32]          | 0.988        |
| AMA             | 1.09 [0.11-10.46]          | 0.938        |
| Sp100           | 5.53 [0.48-63.27]          | 0.169        |
| Gp210           | 5.18 [0.19-142.58]         | 0.331        |
| ALT             | 2.77 [0.28-27.63]          | 0.386        |
| AST             | 4.25 [0.4-45.45]           | 0.231        |
| ALP             | 0.93 [0.07-18.39]          | 0.961        |
| GGT             | 0.79 [0.09-7.18]           | 0.833        |

**Table S3. Stepwise logistic regression for liver steatosis. For abbreviation: BMI: body mass index**

|                     | $\beta$ | Standard Error | p     |
|---------------------|---------|----------------|-------|
| BMI                 | 0.216   | 0.173          | 0.214 |
| Waist circumference | 0.045   | 0.174          | 0.797 |

|                 |              |              |              |
|-----------------|--------------|--------------|--------------|
| <b>Diabetes</b> | <b>0.264</b> | <b>0.103</b> | <b>0.012</b> |
|-----------------|--------------|--------------|--------------|
